# Supplementary material
Source: PubMed Central journal article supplement (PMC3133130)
Supplement: supp_193_11_2726__1.pdf [file supp_193_11_2726__1.pdf]

**Supporting information to: Prophage-stimulated toxin production in *Clostridium difficile* NAP1/027 lysogens**

Ognjen Sekulovic, Mathieu Meessen-Pinard and Louis-Charles Fortier\*

Département de microbiologie et d'infectiologie,

Faculté de médecine et des sciences de la santé,

Université de Sherbrooke, Québec, Canada, J1H 5N4,

\* Corresponding author. Mailing address: Département de microbiologie et d'infectiologie,  
Faculté de médecine et des sciences de la santé, Université de Sherbrooke, 3001 12e Ave Nord,  
Sherbrooke, Québec, Canada, J1H 5N4. Phone: 819-564-5322. Fax: 819-564-5392. E-mail:

Louis-Charles.Fortier@USherbrooke.ca

**Table S1. Primers used in this study**

| Target             | Strand | Primer  | Sequence (5'- 3')                   | Product size (bp) | Reference  |
|--------------------|--------|---------|-------------------------------------|-------------------|------------|
| <i>tcdA</i>        | Fwd    | LCF 398 | AGCTTTCGCTTTAGGCAGTGTTATAAATCAAGC   | 139               | This study |
|                    | Rev    | LCF 399 | TATCAGACTCTATGGCTGGGTTAAGGTG        |                   |            |
| <i>tcdB</i>        | Fwd    | LCF 400 | AGCATATGCGGCAGCTTATCAAGA            | 158               | This study |
|                    | Rev    | LCF 401 | GCATCGTCAAATGACCATAAGCTAGCCATT      |                   |            |
| <i>tcdC</i>        | Fwd    | LCF 444 | AGCTTGTTCTGAAGACCATGAGGAGG          | 112               | This study |
|                    | Rev    | LCF 445 | ACCATGGTTCAGCATCAGACAATTTGC         |                   |            |
| <i>tcdR</i>        | Fwd    | LCF 448 | TCAAAGTAAGTCTGTTTTTGAGGAA           | 153               | (2)        |
|                    | Rev    | LCF 449 | TGCTCTATTTTTAGCCTTATTAACAGC         |                   |            |
| <i>tcdE</i>        | Fwd    | LCF 402 | AAATATGTGCTTATGTGGATTACCAGTACC      | 70                | This study |
|                    | Rev    | LCF 403 | TTCATCCTTAGCATTTCATTTTCATCTGTCATTGC |                   |            |
| 16S<br><i>rRNA</i> | Fwd    | LCF 408 | GGGAGACTTGAGTGCCAGGAG               | 120               | (1)        |
|                    | Rev    | LCF 409 | GTGCCTCAGCGTCAGTTACA                |                   |            |
| Probe A            | Fwd    | LCF 320 | GGGTAGTAAGAAACCAGCTAACCC            | 1,207             | This study |
|                    | Rev    | LCF 411 | GCGTGGTTGACCCTGTATGTTGTT            |                   |            |
| Probe B            | Fwd    | LCF 225 | GTCAGGAAGCCAAACAATAG                | 2,846             | This study |
|                    | Rev    | LCF 249 | TCCGCCCAACTCATTAATC                 |                   |            |

**Table S2: Host range analysis of  $\phi$ CD38-2**

| PCR ribotype * | No. isolates | No. sensitive to $\phi$ CD38-2 | PCR ribotype * | No. isolates | No. sensitive to $\phi$ CD38-2 |
|----------------|--------------|--------------------------------|----------------|--------------|--------------------------------|
| 1              | 2            | 1                              | 22             | 5            |                                |
| 2              | 4            |                                | 23             | 5            | 1                              |
| 3              | 1            |                                | 24             | 13           | 2                              |
| 4              | 1            |                                | 25             | 2            |                                |
| 5              | 1            |                                | 26             | 1            |                                |
| 6              | 3            | 2                              | 27             | 89           | 79                             |
| 7              | 2            | 2                              | 28             | 3            |                                |
| 8              | 1            |                                | 29             | 3            |                                |
| 9              | 3            |                                | 30             | 2            |                                |
| 10             | 1            |                                | 31             | 2            |                                |
| 11             | 1            |                                | 32             | 1            |                                |
| 12             | 5            |                                | 33             | 1            |                                |
| 13             | 2            |                                | 34             | 1            |                                |
| 14             | 22           | 6                              | 35             | 2            | 2                              |
| 15             | 2            |                                | 36             | 3            |                                |
| 16             | 3            | 2                              | 37             | 2            |                                |
| 17             | 6            |                                | 38             | 3            |                                |
| 18             | 1            |                                | 39             | 1            |                                |
| 19             | 1            | 1                              | 40             | 1            |                                |
| 20             | 3            | 1                              | 41             | 1            |                                |
| 21             | 1            |                                |                |              |                                |

\* Except for type 027 that corresponds to the hypervirulent strain BI/NAP1/027, all other ribotype numbers were assigned arbitrarily according to our internal nomenclature.

**TABLE S3. Putative coding sequences from  $\phi$ CD38-2 and bioinformatics analyses of the deduced proteins**

| ORF | Start | End   | Size (bp) | Size (aa) | Ribosome binding site (RBS)        | Predicted fonction <sup>a</sup>          | BLAST hit accession number [source organism] <sup>b</sup>                               | Alignment (%ID)                   | Size (aa) <sup>c</sup> | E-Value         |
|-----|-------|-------|-----------|-----------|------------------------------------|------------------------------------------|-----------------------------------------------------------------------------------------|-----------------------------------|------------------------|-----------------|
| 1   | 29    | 736   | 708       | 235       | gaaaggagTTG                        | Terminase (small)                        | ZP_05399284 [C. difficile QCD-37x79]<br>YP_001308765.1 [C. beijerinckii NCIMB 8052]     | 235/235 (100%)<br>98/236 (41%)    | 235<br>260             | 6E-133<br>6E-35 |
| 2   | 723   | 2045  | 1320      | 440       | agaagaaatagaggcagaatatATG          | Terminase (large)                        | ZP_05399283 [C. difficile QCD-37x79]<br>ZP_02640253 [C. perfringens CPE str. F4969]     | 440/440 (100%)<br>287/440 (65%)   | 440<br>443             | 0E+00<br>3E-166 |
| 3   | 2046  | 3458  | 1413      | 470       | aagagg <sub>tgactaa</sub> ATG      | Minor capsid protein                     | ZP_05399282 [C. difficile QCD-37x79]<br>NP_695169 [Lactobacillus phage phig1e]          | 470/470 (100%)<br>111/434 (25%)   | 470<br>508             | 0E+00<br>3E-35  |
| 4   | 3459  | 4691  | 1233      | 410       | gacaaggg <sub>tggtatgtag</sub> ATG | Minor capsid protein                     | ZP_05399281 [C. difficile QCD-37x79]<br>YP_001974361 [Streptococcus phage PH15]         | 410/410 (100%)<br>64/274 (23%)    | 410<br>381             | 0E+00<br>1E-05  |
| 5   | 4684  | 4968  | 285       | 94        | aaaggagag <sub>aaaa</sub> ATG      | Phage-related protein                    | ZP_05399280 [C. difficile QCD-37x79]<br>ZP_01821446 [Streptococcus pneumoniae SP6-BS73] | 94/94 (100%)<br>37/88 (42%)       | 94<br>87               | 6E-48<br>1E-10  |
| 6   | 5098  | 5670  | 573       | 190       | aggagg <sub>ttttt</sub> ATG        | Scaffolding protein                      | ZP_05399279 [C. difficile QCD-37x79]<br>NP_469454 [Listeria innocua Clip11262]          | 190/190 (100%)<br>61/196 (31%)    | 190<br>189             | 6E-101<br>9E-09 |
| 7   | 5681  | 6754  | 1074      | 357       | aggagg <sub>tagaaa</sub> ATG       | Major capsid protein                     | ZP_05399278 [C. difficile QCD-37x79]<br>YP_001391656 [C. botulinum F str. Langeland]    | 357/357 (100%)<br>95/345 (27%)    | 357<br>321             | 0E+00<br>3E-23  |
| 8   | 6758  | 7090  | 333       | 110       | gagaggg <sub>taggct</sub> ATG      |                                          | ZP_05399277 [C. difficile QCD-37x79]<br>ZP_02640259 [C. perfringens CPE str. F4969]     | 110/110 (100%)<br>47/114 (41%)    | 110<br>114             | 5E-57<br>1E-12  |
| 9   | 7092  | 7526  | 435       | 144       | gagg <sub>tgtttagt</sub> GTG       |                                          | ZP_05399276 [C. difficile QCD-37x79]<br>ZP_02616048 [C. botulinum Bf]                   | 144/144 (100%)<br>58/143 (40%)    | 144<br>136             | 2E-76<br>2E-21  |
| 10  | 7533  | 7880  | 348       | 115       | ggaggcaga <sub>ataataggg</sub> ATG |                                          | ZP_05399275 [C. difficile QCD-37x79]<br>ZP_02633339 [C. perfringens E str. JGS1987]     | 115/115 (100%)<br>59/115 (51%)    | 115<br>117             | 2E-61<br>1E-22  |
| 11  | 7877  | 8308  | 432       | 143       | ggaggtaga <sub>agggga</sub> ATG    |                                          | ZP_05399274 [C. difficile QCD-37x79]<br>ZP_02616050 [C. botulinum Bf]                   | 143/143 (100%)<br>70/141 (49%)    | 143<br>143             | 2E-78<br>5E-37  |
| 12  | 8311  | 9111  | 800       | 266       | aaaggagaa <sub>atgtaaaa</sub> ATG  | Major structural protein                 | ZP_05399273 [C. difficile QCD-37x79]<br>ZP_02640263 [C. perfringens CPE str. F4969]     | 266/266 (100%)<br>73/156 (46%)    | 266<br>168             | 2E-152<br>3E-29 |
| 13  | 9127  | 9489  | 363       | 120       | aagaggggg <sub>ctaaggaa</sub> ATG  |                                          | ZP_05399272 [C. difficile QCD-37x79]<br>ZP_02616053 [C. botulinum Bf]                   | 120/120 (100%)<br>49/123 (39%)    | 120<br>114             | 3E-63<br>5E-14  |
| 14  | 9489  | 10094 | 606       | 201       | aacgtagag <sub>ctaaaaata</sub> ATG |                                          | ZP_05399271 [C. difficile QCD-37x79]<br>ZP_02616054 [C. botulinum Bf]                   | 201/201 (100%)<br>119/202 (58%)   | 201<br>197             | 3E-113<br>3E-63 |
| 15  | 10168 | 10809 | 642       | 213       | gggggggg <sub>attggt</sub> ATG     |                                          | ZP_05332086 [C. difficile QCD-37x79]<br>ZP_02949175 [C. butyricum 5521]                 | 213/213 (100%)<br>31/72 (43%)     | 213<br>362             | 8E-119<br>1E-06 |
| 16  | 10920 | 16070 | 5151      | 1716      | aaaaggggg <sub>tgatag</sub> ATG    | Tail tape measure                        | ZP_05399269 [C. difficile QCD-37x79]<br>ZP_02640311 [C. perfringens CPE str. F4969]     | 1716/1716 (100%)<br>178/702 (25%) | 1716<br>933            | 0E+00<br>4E-62  |
| 17  | 16191 | 16925 | 735       | 244       | gagagggg <sub>gcataaagct</sub> ATG | Major tail protein                       | ZP_05399268 [C. difficile QCD-37x79]<br>YP_001787259 [C. botulinum A3 str. Loch Maree]  | 244/244 (100%)<br>87/241 (36%)    | 244<br>225             | 3E-137<br>4E-29 |
| 18  | 17285 | 19054 | 1770      | 589       | agaaagt <sub>ttggaa</sub> TTG      | Tail protein / putative RBP <sup>d</sup> | ZP_05399267 [C. difficile QCD-37x79]<br>ZP_02621516 [C. botulinum C str. Eklund]        | 589/589 (100%)<br>81/245 (33%)    | 589<br>568             | 0E+00<br>1E-24  |
| 19  | 19081 | 19323 | 243       | 80        | aaaagggag <sub>aagaagt</sub> ATG   |                                          | ZP_05399266 [C. difficile QCD-37x79]<br>YP_699982 [C. phage phiSM101]                   | 80/80 (100%)<br>27/75 (36%)       | 80<br>82               | 3E-38<br>0.022  |
| 20  | 19338 | 21800 | 2463      | 820       | aaaaggag <sub>tgataaat</sub> TTG   | Tail fiber protein                       | ZP_05399319 [C. difficile QCD-37x79]<br>ZP_782154 [C. tetani E88]                       | 476/478 (99%)<br>45/149 (30%)     | 478<br>660             | 0E+00<br>3E-05  |

| ORF | Start | End   | Size (bp) | Size (aa) | Ribosome binding site (RBS)                | Predicted fonction <sup>a</sup> | BLAST hit accession number [source organism] <sup>b</sup> | Alignment (%ID) | Size (aa) <sup>c</sup> | E-Value |
|-----|-------|-------|-----------|-----------|--------------------------------------------|---------------------------------|-----------------------------------------------------------|-----------------|------------------------|---------|
| 21  | 21800 | 23650 | 1851      | 616       | agaagagg <sub>tgag</sub> ta <b>ATG</b>     | Tail fiber protein              | ZP_05399318 [C. difficile QCD-37x79]                      | 616/616 (100%)  | 616                    | 0E+00   |
|     |       |       |           |           |                                            |                                 | YP_719584 [Haemophilus somnus 129PT]                      | 67/238 (28%)    | 762                    | 4E-13   |
| 22  | 23736 | 23999 | 264       | 87        | aggagg <sub>aaagt</sub> ta <b>ATG</b>      | Holin                           | ZP_05399317 [C. difficile QCD-37x79]                      | 87/87 (100%)    | 87                     | 3E-41   |
|     |       |       |           |           |                                            |                                 | ADK37889 [C. difficile phage phiCD6356 ORF27]             | 78/84 (93%)     | 87                     | 9E-42   |
| 23  | 24000 | 24806 | 807       | 268       | agaaagaagg <sub>tctt</sub> aa <b>ATG</b>   | Endolysine                      | ZP_05399316 [C. difficile QCD-37x79]                      | 268/268 (100%)  | 268                    | 1E-154  |
|     |       |       |           |           |                                            |                                 | ADK37890 [C. difficile phage phiCD6356 ORF28]             | 237/268 (89%)   | 268                    | 2E-143  |
| 24  | 25067 | 24855 | 213       | 70        | aagagagg <sub>tg</sub> tgaaaa <b>ATG</b>   |                                 | ZP_05399315 [C. difficile QCD-37x79]                      | 70/70 (100%)    | 70                     | 5E-29   |
|     |       |       |           |           |                                            |                                 | ZP_02086761 [C. bolteae ATCC BAA-613]                     | 21/68 (30%)     | 70                     | 4E-06   |
| 25  | 25246 | 26076 | 831       | 276       | aaggggg <sub>taag</sub> caaga <b>ATG</b>   |                                 | ZP_05399314 [C. difficile QCD-37x79]                      | 276/276 (100%)  | 276                    | 1E-152  |
|     |       |       |           |           |                                            |                                 | YP_699976 [Clostridium phage phiSM101]                    | 50/127 (39%)    | 137                    | 2E-13   |
| 26  | 26155 | 26661 | 507       | 168       | ggagga <sub>ttga</sub> gt <b>ATG</b>       |                                 | ZP_05399313 [C. difficile QCD-37x79]                      | 168/168 (100%)  | 168                    | 7E-90   |
|     |       |       |           |           |                                            |                                 | ZP_05399427 [C. difficile QCD-37x79]                      | 154/168 (91%)   | 168                    | 2E-81   |
| 27  | 26681 | 27151 | 471       | 156       | ggagga <sub>tata</sub> aaaa <b>ATG</b>     |                                 | ZP_05331942 [C. difficile QCD-63q42]                      | 156/156 (100%)  | 156                    | 9E-84   |
| 28  | 27665 | 27384 | 282       | 93        | aaaaagggg <sub>ttg</sub> gaaa <b>ATG</b>   |                                 | ZP_05399311 [C. difficile QCD-37x79]                      | 92/93 (98%)     | 93                     | 2E-46   |
|     |       |       |           |           |                                            |                                 | YP_001088968 [C. difficile 630]                           | 31/85 (36%)     | 491                    | 2E-03   |
| 29  | 28141 | 27809 | 333       | 110       | agaaggggag <sub>tgtt</sub> atag <b>ATG</b> |                                 | ZP_05399310 [C. difficile QCD-37x79]                      | 106/110 (96%)   | 110                    | 3E-51   |
| 30  | 28951 | 28142 | 807       | 269       | gaggtggag <sub>gaaa</sub> <b>ATG</b>       | ParA/SOJ-like protein           | ZP_05331939 [C. difficile QCD-37x79]                      | 265/269 (98%)   | 269                    | 1E-151  |
|     |       |       |           |           |                                            |                                 | ADK37894 [C. difficile phage phiCD6356 ORF32]             | 98/266 (37%)    | 272                    | 4E-49   |
| 31  | 29420 | 29238 | 183       | 60        | aaaaaggag <sub>cta</sub> atga <b>ATG</b>   |                                 | ZP_05399308 [C. difficile QCD-37x79]                      | 60/60 (100%)    | 60                     | 3E-27   |
|     |       |       |           |           |                                            |                                 | ADK37895 [C. difficile phage phiCD6356 ORF33]             | 57/60 (95%)     | 60                     | 9E-31   |
| 32  | 29788 | 29660 | 129       | 42        | agaaaggagga <sub>aac</sub> ggga <b>ATG</b> | Membrane protein <sup>e</sup>   | ZP_05399307 [C. difficile QCD-37x79]                      | 42/42 (100%)    | 42                     | 8E-13   |
| 33  | 30391 | 30239 | 153       | 50        | aaagggagg <sub>tgat</sub> gaagt <b>ATG</b> | Membrane protein <sup>e</sup>   | ZP_05399306 [C. difficile QCD-37x79]                      | 50/50 (100%)    | 50                     | 5E-20   |
|     |       |       |           |           |                                            |                                 | ADK37896 [C. difficile phage phiCD6356 ORF34]             | 46/48 (96%)     | 50                     | 3E-23   |
| 34  | 30432 | 30617 | 183       | 61        | gggagg <sub>ata</sub> atctt <b>TTG</b>     | Secreted protein <sup>e</sup>   | ZP_05399305 [C. difficile QCD-37x79]                      | 61/61 (100%)    | 61                     | 5E-24   |
| 35  | 30911 | 33076 | 2163      | 721       | ggaggg <sub>ata</sub> aaag <b>ATG</b>      | DNAse/Helicase                  | ZP_05399304 [C. difficile QCD-37x79]                      | 721/721 (100%)  | 721                    | 0E+00   |
|     |       |       |           |           |                                            |                                 | YP_659583 [C. difficile 630]                              | 375/703 (53%)   | 869                    | 0E+00   |
| 36  | 33123 | 33470 | 348       | 115       | aaggag <sub>ata</sub> aaaagg <b>ATG</b>    |                                 | ZP_05399303 [C. difficile QCD-37x79]                      | 115/115 (100%)  | 115                    | 4E-57   |
| 37  | 33683 | 33793 | 111       | 36        | agaaaacagagg <sub>tta</sub> <b>TTG</b>     |                                 | ZP_05331922 [C. difficile QCD-63q42]                      | 36/36 (100%)    | 36                     | 2E-10   |
| 38  | 34150 | 34245 | 93        | 31        | aggggg <sub>at</sub> gattgg <b>TTG</b>     |                                 | ZP_05399302 [C. difficile QCD-37x79]                      | 31/31 (100%)    | 31                     | 3E-07   |
| 39  | 34643 | 34290 | 354       | 117       | gaaaggag <sub>t</sub> tttaa <b>ATG</b>     | CI phage repressor              | ZP_05399301 [C. difficile QCD-37x79]                      | 117/117 (100%)  | 117                    | 1E-60   |
|     |       |       |           |           |                                            |                                 | ADK37900 [C. difficile phage phiCD6356 ORF38]             | 26/64 (41%)     | 122                    | 2E-09   |
| 40  | 34816 | 34998 | 183       | 60        | aggagg <sub>ttgt</sub> ttct <b>ATG</b>     |                                 | ZP_05399300 [C. difficile QCD-37x79]                      | 60/60 (100%)    | 60                     | 3E-24   |
| 41  | 35065 | 35490 | 426       | 141       | aaggagg <sub>ctg</sub> gaaa <b>ATG</b>     |                                 | ZP_05399299 [C. difficile QCD-37x79]                      | 141/141 (100%)  | 141                    | 5E-74   |
| 42  | 35565 | 35969 | 405       | 134       | agaaggggg <sub>gtt</sub> taaaag <b>ATG</b> | Replication terminator          | ZP_05399298 [C. difficile QCD-37x79]                      | 134/134 (100%)  | 134                    | 1E-70   |
|     |       |       |           |           |                                            |                                 | YP_535158 [Lactobacillus phage Sal2]                      | 42/120 (35%)    | 138                    | 5E-10   |
| 43  | 35992 | 36705 | 714       | 237       | aaaaaggag <sub>tgt</sub> ttaat <b>ATG</b>  |                                 | ZP_05399297 [C. difficile QCD-37x79]                      | 237/237 (100%)  | 237                    | 1E-133  |
|     |       |       |           |           |                                            |                                 | NP_782698 [C. tetani E88]                                 | 120/228 (52%)   | 238                    | 1E-55   |
| 44  | 36761 | 36925 | 165       | 54        | aaaaaggag <sub>tgt</sub> ttatt <b>TTG</b>  |                                 | ZP_05399296 [C. difficile QCD-37x79]                      | 54/54 (100%)    | 54                     | 5E-22   |
|     |       |       |           |           |                                            |                                 | ADK37907 [C. difficile phage phiCD6356 ORF45]             | 16/52 (31%)     | 58                     | 4E-03   |
| 45  | 36922 | 37233 | 312       | 103       | aggagg <sub>ctg</sub> ggca <b>ATG</b>      |                                 | ZP_05399295 [C. difficile QCD-37x79]                      | 103/103 (100%)  | 103                    | 2E-50   |
|     |       |       |           |           |                                            |                                 | ADK37908 [C. difficile phage phiCD6356 ORF46]             | 48/106 (46%)    | 121                    | 4E-15   |

| ORF | Start | End   | Size (bp) | Size (aa) | Ribosome binding site (RBS)     | Predicted fonction <sup>a</sup> | BLAST hit accession number [source organism] <sup>b</sup> | Alignment (%ID) | Size (aa) <sup>c</sup> | E-Value |
|-----|-------|-------|-----------|-----------|---------------------------------|---------------------------------|-----------------------------------------------------------|-----------------|------------------------|---------|
| 46  | 37279 | 37428 | 150       | 49        | aggaggctgggca <b>ATG</b>        |                                 | ZP_05399294 [C. difficile QCD-37x79]                      | 49/49 (100%)    | 49                     | 1E-19   |
|     |       |       |           |           |                                 |                                 | ADK37909 [C. difficile phage phiCD6356 ORF47]             | 33/47 (71%)     | 58                     | 1E-15   |
| 47  | 37459 | 37632 | 174       | 57        | gaatggaggatataaat <b>ATG</b>    |                                 | ZP_05399293 [C. difficile QCD-37x79]                      | 57/57 (100%)    | 57                     | 2E-25   |
|     |       |       |           |           |                                 |                                 | ADK37911 [C. difficile phage phiCD6356 ORF49]             | 43/57 (76%)     | 57                     | 2E-23   |
| 48  | 37632 | 37748 | 117       | 38        | gaaaggaatgacgaaatata <b>ATG</b> |                                 | ZP_05399292 [C. difficile QCD-37x79]                      | 38/38 (100%)    | 38                     | 5E-13   |
|     |       |       |           |           |                                 |                                 | ZP_05401366 [C. difficile QCD-23m63]                      | 22/38 (57%)     | 40                     | 6E-05   |
| 49  | 37745 | 38071 | 327       | 108       | aagggggagggtggaa <b>ATG</b>     | SSB <sup>f</sup>                | ZP_05399291 [C. difficile QCD-37x79]                      | 108/108 (100%)  | 108                    | 7E-56   |
|     |       |       |           |           |                                 |                                 | ADK37912 [C. difficile phage phiCD6356 ORF50]             | 97/106 (92%)    | 135                    | 1E-54   |
| 50  | 38163 | 38528 | 363       | 121       | aagtaggtgattaa <b>ATG</b>       |                                 | ZP_05399290 [C. difficile QCD-37x79]                      | 121/121 (100%)  | 121                    | 6E-65   |
|     |       |       |           |           |                                 |                                 | YP_002290935 [C. difficile phage phiCD27]                 | 49/122 (40%)    | 121                    | 2E-10   |
| 51  | 38512 | 38685 | 174       | 57        | aagtaggtgattaa <b>ATG</b>       |                                 | ZP_05399289 [C. difficile QCD-37x79]                      | 57/57 (100%)    | 57                     | 3E-23   |
|     |       |       |           |           |                                 |                                 | ADK37917 [C. difficile phage phiCD6356 ORF55]             | 27/53 (51%)     | 56                     | 2E-11   |
| 52  | 38697 | 39269 | 573       | 190       | aggaagtgaattt <b>ATG</b>        | Sigma70/SigmaF-like             | ZP_05399288 [C. difficile QCD-37x79]                      | 190/190 (100%)  | 190                    | 4E-103  |
|     |       |       |           |           |                                 |                                 | ADK37918 [C. difficile phage phiCD6356 ORF56]             | 61/145 (43%)    | 153                    | 1E-27   |
| 53  | 39447 | 40055 | 609       | 202       | gagaaggtgaatagaa <b>GTG</b>     | Integrase                       | ZP_05399287 [C. difficile QCD-37x79]                      | 202/202 (100%)  | 202                    | 3E-113  |
|     |       |       |           |           |                                 |                                 | YP_001885139 [C. botulinum B str. Eklund 17B]             | 122/198 (61%)   | 212                    | 6E-63   |
| 54  | 40265 | 40372 | 108       | 35        | ggtgaagcttaaggac <b>ATG</b>     |                                 | ZP_05332102 [C. difficile QCD-63q42]                      | 43/43 (100%)    | 43                     | 4E-16   |
|     |       |       |           |           |                                 |                                 | ZP_05399286 [C. difficile QCD-37x79]                      | 34/35 (97%)     | 43                     | 2E-11   |
| 55  | 40521 | 41090 | 567       | 189       | agtaaggggtgtatttt <b>ATG</b>    | Resolvase                       | ZP_05399285 [C. difficile QCD-37x79]                      | 189/189 (100%)  | 189                    | 2E-107  |
|     |       |       |           |           |                                 |                                 | YP_001090102 [C. difficile 630]                           | 114/185 (61%)   | 189                    | 1E-58   |

<sup>a</sup> Inferred from BLASTp analyses on protein sequences in GenBank and ACLAME databases, and by the presence of conserved domains found through searches in the conserved domains database (CDD) at NCBI and by InterProScan analysis

<sup>b</sup> The best hit is shown along with another relevant hit when available (excluding hits from the QCD-63q42 strain)

<sup>c</sup> Size in amino acids (aa) of the BLAST hit (which may be used to calculate the overall %ID)

## REFERENCES

1. **Denève, C., S. Bouttier, B. Dupuy, F. Barbut, A. Collignon, and C. Janoir.** 2009. Effects of subinhibitory concentrations of antibiotics on colonization factor expression by moxifloxacin-susceptible and moxifloxacin-resistant *Clostridium difficile* strains. *Antimicrob Agents Chemother* **53**:5155-5162.
2. **Govind, R., G. Vedyappan, R. D. Rolfe, B. Dupuy, and J. A. Fralick.** 2009. Bacteriophage-mediated toxin gene regulation in *Clostridium difficile*. *J Virol* **83**:12037-12045.
